# Supplementary material for: Decrement in Cellular Iron and Reactive Oxygen Species, and Improvement of Insulin Secretion in a Pancreatic Cell Line Using Green Tea Extract
Source: PubMed Central journal article supplement — Pancreas. 2019 May 10;48(5):636–43. doi: 10.1097/MPA.0000000000001320 (PMC6553981; doi:10.1097/mpa.0000000000001320), 2019-05-10
Supplement: mpa-48-636-s001.pdf [file mpa-48-636-s001.pdf]

# Decrement in Cellular Iron and Reactive Oxygen Species, and Improvement of Insulin Secretion in a Pancreatic Cell Line Using Green Tea Extract

## SUPPLEMENTAL DIGITAL CONTENT

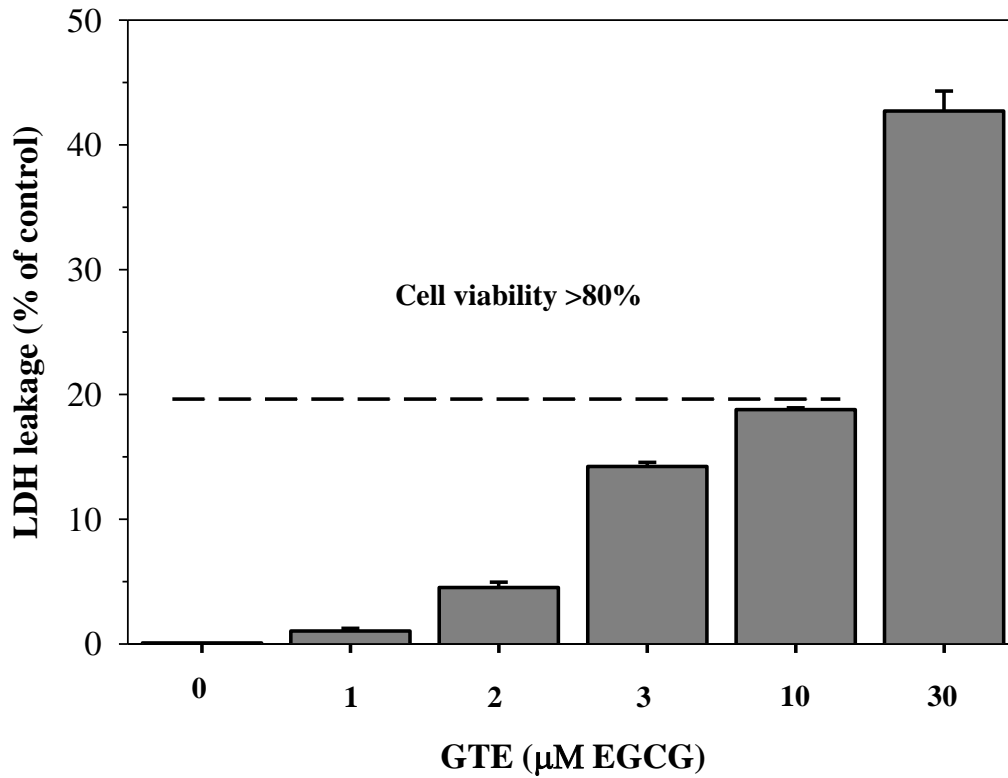

**SUPPLEMENTAL FIGURE 1.** Leakage of LDH from RINm5F cells incubated with complete medium containing GTE (1-30 mM EGCG). Data obtained from three independent experiments are expressed as mean  $\pm$  SEM.
